# Supplementary material
Source: publisher figshare collection journal article supplement (https://gsapubs.figshare.com/ndownloader/files/38162988)
Supplement: Supplementary file 1 [file 38162988]

## Sheet: Sheet1
x	station	unit	restored paleocurrent trend	n	lithofacies	meas_type	latitude	longitude		Smith, T.M., Saylor, J.E., Lapen, T.J., Hatfield, K., and Sundell, K.E., 2022, Identifying sources of non-unique detrital age distributions through integrated provenance analysis: An example from the Paleozoic Central Colorado Trough: Geosphere, v. 18, https://doi.org/10.1130/GES02541.1
1	4SMST-EXT	Mb. 5, upper Sangre de Cristo Fm.	280	5	St	trough axes	38.5158	-105.825
2	4SMST565	Mb. 4, upper Sangre de Cristo Fm.	196	24	St	trough limbs	38.481	-105.84
2	4SMST212	Mb. 4, upper Sangre de Cristo Fm.	219	20	St	trough limbs	38.479	-105.845
2	4SMST348	Mb. 4, upper Sangre de Cristo Fm.	221	19	St	trough limbs	38.4803	-105.843
2	4SMST764	Mb. 4, upper Sangre de Cristo Fm.	234	20	St	trough limbs	38.4812	-105.838
2	3SMST653	Mb. 4, upper Sangre de Cristo Fm.	246	19	St	trough limbs & axis	38.4764	-105.85
2	3SMST436	Mb. 4, upper Sangre de Cristo Fm.	264.5	18	St	trough limbs	38.476	-105.851
2	3SMST737	Mb. 4, upper Sangre de Cristo Fm.	269.231	21	St	trough limbs & axis	38.4778	-105.849
2	3SMST458	Mb. 4, upper Sangre de Cristo Fm.	329.2	16	St	trough limbs	38.4761	-105.851
3	2SMST112	Mb. 3, lower Sangre de Cristo Fm.	219	20	St	trough limbs	38.472	-105.863
3	3SMST298	Mb. 3, lower Sangre de Cristo Fm.	244	20	St	trough limbs	38.4763	-105.854
3	1SMST662	Mb. 3, lower Sangre de Cristo Fm.	254	20	St	trough limbs	38.4738	-105.866
3	3SMST194	Mb. 3, lower Sangre de Cristo Fm.	308.636	11	St	trough axes	38.4754	-105.856
4	1SMST544	Mb. 2, lower Sangre de Cristo Fm.	210	20	St	trough limbs	38.4751	-105.87
4	1SMST376	Mb. 2, lower Sangre de Cristo Fm.	228	20	St	trough limbs	38.4734	-105.872
5	1SMST207	Mb. 1, lower Sangre de Cristo Fm.	228.2	10	St	trough axes	38.4763	-105.877
5	1SMST281	Mb. 1, lower Sangre de Cristo Fm.	233	20	St	trough limbs	38.4745	-105.875
5	1SMST9	Mb. 1, lower Sangre de Cristo Fm.	238	17	St	trough limbs	38.4767	-105.881
5	1SBMT420	Mb. 1, lower Sangre de Cristo Fm.	292	21	St	trough limbs	38.4752	-105.883
5	1SBMT215	Mb. 1, lower Sangre de Cristo Fm.	328	19	St	trough limbs	38.4755	-105.887
7	2SBMTT62	Sharpsdale Fm.	**20	1	St	trough limbs	38.4809	-105.907
8	1SBMT122	Minturn Fm.	18	20	St	trough limbs	38.4765	-105.888
8	1SBMT54	Minturn Fm.	301	20	St	trough limbs	38.4756	-105.891
				114
			mean paleocurrent	N	n
		Sharpsdale Fm.	**20	1	1
		Minturn Fm.	339.5	2	40
		lower Sangre de Cristo Fm. (Mb. 1)	263.84	5	87
		lower Sangre de Cristo Fm. (Mbs. 2 & 3)	243.939	6	111
		upper Sangre de Cristo Fm. (Mbs. 4 & 5)	250.992	9	162
	** indicates low confidence because of low n-value
